# Supplementary material
Source: Elsevier journal article supplement (https://www.sciencedirect.com/science/article/pii/S2603647921000725)
Supplement: mmc1 [file S2603647921000725:mmc1.doc]

**ANEXO 1.- Cuestionario de Conocimientos del Taller de Rodilla (CCTR).**

*CUESTIONARIO DE CONOCIMIENTOS*

**Por favor, MARQUE CON UNA CRUZ la respuesta que considere más apropiada:**

**0.- De los siguientes nombres, ¿Cuál es una ciudad de Cataluña?:**

- París
- Hong Kong
- Barcelona

**1.- La persona más importante de este proceso:**

- Son mis familiares, que tienen que cuidar de mí.
- Son los profesionales de la salud.
- Soy yo, que soy el/la paciente y quién decide finalmente si me operan o no.

**2.- Me informarán del día y la hora de la operación:**

- Tengo que llamar para que me lo digan.
- Por teléfono, una semana antes de la operación.
- Me llamarán del Ambulatorio.

**3.- El día de la operación, ¿puedo o debo beber agua o infusiones?**

- No puedo tomar nada.
- Puedo comer de todo, pero con moderación.
- Si que puedo tomar agua e infusiones claras hasta dos horas antes de la operación.

**4.- Unas horas después de la intervención:**

- En el Hospital me lo harán todo, no tendré que preocuparme.
- Tendré que empezar mis ejercicios el mismo día de la intervención.
- Tendré que hacer reposo, aunque me encuentre bien para cuidar la herida.

**5.- Estaré ingresado/a en el hospital:**

- Una o dos semanas, hasta que ande bien.
- Dos días, hasta que ya pueda caminar rápido.
- Hasta que se cumplan los criterios para el alta, habitualmente 3 días y 2 noches (si me ponen prótesis en toda la rodilla) o 2 días y 1 noche (si me ponen la mitad de la prótesis en la rodilla).

**6.- Cuando me suban del quirófano y me siente en la silla de la habitación:**

- Mejor que no flexione la pierna, porque me sangrará más la herida.
- Debería flexionar la rodilla, con la máxima flexión confortable.
- Debería flexionar la rodilla, con la máxima flexión forzada.

**7.- Si tengo más molestias de lo deseable después de la intervención:**

- He de tener en cuenta que me han operado y que es normal que la herida moleste o que duela.
- No podré hacer nada por evitarlo.
- Seguro que me molestará más si me muevo, aunque me mueva poco.

**8.- Es importante estirar al máximo la rodilla y para conseguirlo:**

- Estirar la rodilla no tiene importancia, sólo hay que conseguir doblarla.
- Haré los ejercicios y cuando descanse en la cama durante el día, tendré la pierna bien estirada.
- Haré los ejercicios y cuando descanse en la cama durante el día, tendré la pierna bien doblada.

**9.- ¿Cómo me iré de alta?**

- En ambulancia, acompañado de un familiar.
- Andando con muletas, acompañado por un familiar.
- En vehículo particular, conducido por otra persona.

**10.- ¿Qué debo hacer si tengo mucho dolor y la medicación que tomo cada cuatro horas no es efectiva?**

- Ir a urgencias.
- Tomar la medicación que me han pautado como “si precisa” o “de rescate”.
- Tomarme más medicación y aguantaré el dolor.

**11.- Ante cualquier duda o problema, tanto antes como después de la operación:**

- Preguntaré al médico de cabecera
- Intentaré contactar con traumatólogo.
- Llamaré a la enfermera pre-quirúrgica de 9 a 15h de lunes a viernes.
